# Supplementary material for: Heteroatom-doped nanoporous carbon from recyclable Pueraria lobata and its dual activities for oxygen reduction and hydrogen evolution reactions
Source: Royal Society of Chemistry journal article supplement (doi:10.1039/c8ra03572e), 2018-01-01
Supplement: c8ra03572e1.pdf [file c8ra03572e1.pdf]

## Supporting Information

### Heteroatom-Doped Nanoporous Carbon from Recyclable *Pueraria Lobata* and Its Dual Activities for Oxygen Reduction and Hydrogen Evolution Reaction

Wen-Chao Lu <sup>a,†</sup>, Zi-Chun Zhu <sup>b,†</sup>, Bei-Hua Hou <sup>a</sup>, Hai-Xia Zhang <sup>a</sup>, Min-Ji Liao <sup>a</sup>, Zhen-Yu  
Wu <sup>a,\*</sup>, Ping Chen <sup>a,\*</sup>

<sup>a</sup> School of Chemistry and Chemical Engineering, Anhui University, Hefei, Anhui, 230601, P. R.  
China

<sup>b</sup> School of Chemistry and Materials Engineering, Chizhou University, Chizhou, Anhui, 247000  
,P.R.China

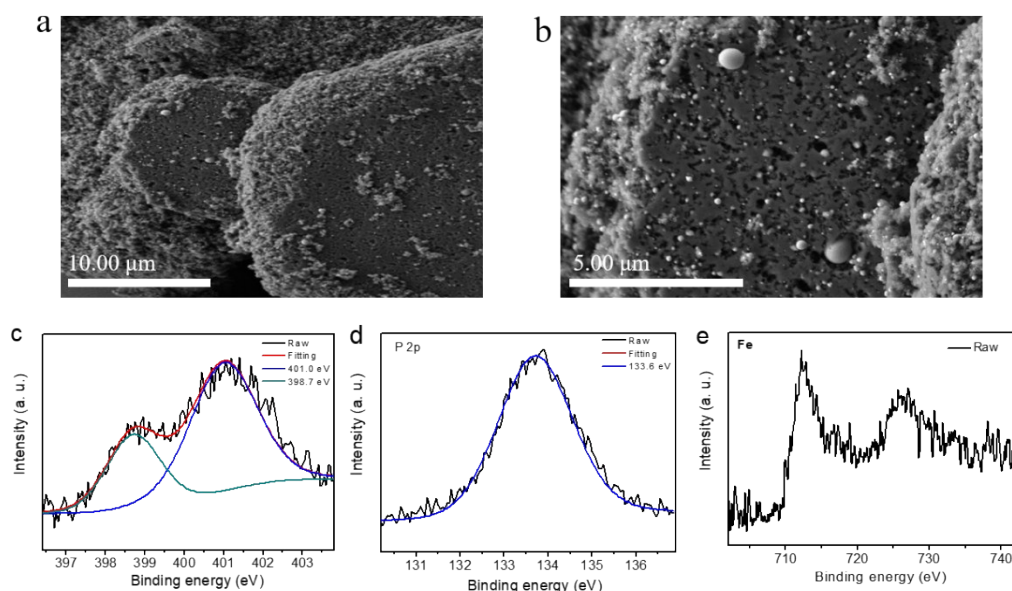

Figure S1 (a-b) SEM image of the product-N<sub>2</sub>; (c-e) high-resolution N1s, P2p and Fe 2p XPS spectra of the product-N<sub>2</sub>

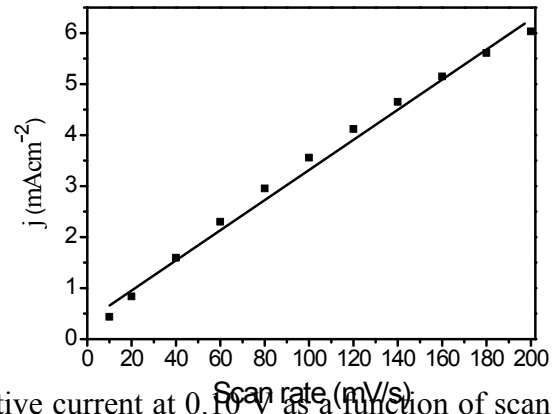

Figure S2 Capacitive current at 0.10 V as a function of scan rate for the product-N<sub>2</sub> ( $\Delta j_0 = j_a - j_c$ )
